# Supplementary material for: Exploring Mechanisms of Antifungal Lipopeptide Iturin A from Bacillus against Aspergillus niger
Source: MDPI journal article supplement (doi:10.3390/jof10030172), 2024-02-24
Supplement: s1 [file s1]

# Labelfree Proteomics Assay Reference Methods

## 1. Materials and Reagents

**TableS1:** Main Materials and Reagents

| Reagent name         | Supplier        |
|----------------------|-----------------|
| trypsin              | Promega         |
| acetonitrile         | Fisher Chemical |
| trifluoroacetic acid | Sigma Aldrich   |
| formic acid          | Fluka           |
| iodoacetamide        | Sigma           |
| dithiothreitol       | Sigma           |
| urea                 | Sigma           |
| trichloroacetic acid | Sigma           |
| protease inhibitor   | Calbiochem      |
| EDTA                 | Sigma           |
| TEAB                 | Sigma           |
| H <sub>2</sub> O     | Fisher Chemical |

**TableS2:** Instrument list

| Instrument                                  | Model         | Brand                    |
|---------------------------------------------|---------------|--------------------------|
| Ultra High Performance Liquid Chromatograph | EASY-nLC 1200 | Thermo Fisher Scientific |
| High Resolution Mass Spectrometry           | Q-Exactive HF | Thermo Fisher Scientific |

## 2. Methods

### 2.1. Protein Extraction

Suitable protein extraction and precipitation purification methods were selected based on the samples, and the protein concentration of each sample was determined using the kit.

### 2.2. Enzymatic Desalination

An appropriate amount of total protein was taken and added to the reducing agent buffer and reacted for 1 hour at 37°C. The reaction was carried out in the dark for 45 min at room temperature. Subsequently, IAA was added to a final concentration of 50 mM and the reaction was carried out in the dark for 45 min at room temperature. The reaction was quenched by the addition of 1M DTT solution of IAA, and the final concentration of urea was brought to less than 1 mol/L using 50 mmol/L NH<sub>4</sub>HCO<sub>3</sub> solution. Finally, sequencing grade trypsin solution was added, incubated overnight at 37°C, and the digested peptides were desalted using a C18 solid phase extraction column.

### 2.3. LC-MS Analysis

Mobile phase A was an aqueous solution containing 0.1% (v/v) formic acid; mobile phase B was acetonitrile containing 0.1% (v/v) formic acid. Peptides were dissolved in phase A of the liquid chromatography mobile phase and separated using

the nanoACQUITY UPLC M-Class system (Waters, USA). The liquid gradient was set from 0 to 120 min, 8% to 100% mobile phase B. The flow rate was maintained at 300 nL/min.

The peptides were separated by the ultra-high performance liquid phase system and injected into the NSI ion source for ionization, and then analyzed by the Q Exactive HF mass spectrometer. The ion source voltage was set to 2.3 kV, and both the peptide precursor ions and their secondary fragments were detected and analyzed using a high-resolution Orbitrap in the Q Exactive HF. The scanning range of the primary mass spectrometer was set to 400-1800 m/z, the scanning resolution was set to 60000, and the secondary scanning resolution was set to 15000. The data acquisition mode uses a data-dependent (DDA) program, that is, after the first-level scan, the precursor ions of the top 20 peptides with the highest signal intensity are selected and sequentially entered into the HCD collision cell for fragmentation with a fragmentation energy of 28ev, and the second-level mass spectrometry is also performed sequentially. To improve the effective utilization of mass spectrometry, the automatic gain control (AGC) was set to 3E6, the signal threshold was set to 10000 ions, the maximum ion injection time was set to 50 ms, and the dynamic exclusion time of tandem mass spectrometry scanning was set to 45 s to avoid repeated scans of precursor ions.

**TableS3:** LC mobile phase conditions

| Time(min) | Flow rate( $\mu$ L/min) | A% | B%  |
|-----------|-------------------------|----|-----|
| 0         | 300                     | 92 | 8   |
| 98        | 300                     | 72 | 28  |
| 113       | 300                     | 63 | 37  |
| 117       | 300                     | 0  | 100 |
| 120       | 300                     | 0  | 100 |
